# Supplementary material for: Stereochemical characterisation of the non-canonical α-humulene synthase from Acremonium strictum
Source: Royal Society of Chemistry journal article supplement (doi:10.1039/d1ob01769a), 2021-01-01
Supplement: d1ob01769a1.pdf [file d1ob01769a1.pdf]

## Preparation of humulene epoxides

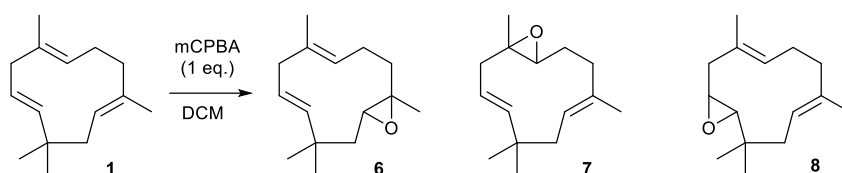

To a solution of humulene **1** (124.0 mg, 0.61 mmol, 1 eq.) in CH<sub>2</sub>Cl<sub>2</sub> (6 mL) at –10 °C was added portionwise *m*CPBA (77%, 136.0 mg, 0.61 mmol, 1 eq.). After stirring at –10 °C for 24 h, the reaction mixture was diluted with H<sub>2</sub>O (20 mL) and extracted with diethyl ether (3 × 10 mL). The combined organic phases were dried over MgSO<sub>4</sub> and then concentrated under reduced pressure. The residue was purified by column chromatography on silica gel (petrol ether / diethyl ether = 6 / 1) to give **8** and a mixture of **6** and **7**. The mixture of **6** and **7** was further purified by preparative HPLC on a chiral stationary phase to give (+)-**6**, (–)-**6**, (+)-**7** and (–)-**7**.<sup>1</sup>

Compound (+)-**6**. TLC (petrol ether / diethyl ether = 5 / 1): *R*<sub>f</sub> = 0.38; yield: 4.0 mg, 0.02 mmol (3%); optical rotation: [α]<sub>D</sub><sup>25</sup> = +65.5 (c 0.41, benzene); GC (HP-5MS): *I* = 1629; <sup>1</sup>H-NMR and <sup>13</sup>C-NMR see Table S1.

Compound (–)-**6**. TLC (petrol ether / diethyl ether = 5 / 1): *R*<sub>f</sub> = 0.38; yield: 4.0 mg, 0.02 mmol (3%); optical rotation: [α]<sub>D</sub><sup>25</sup> = –45.9 (c 0.47, benzene), lit: [α]<sub>D</sub> = –22.8 (CHCl<sub>3</sub>);<sup>1</sup> GC (HP-5MS): *I* = 1629; <sup>1</sup>H-NMR and <sup>13</sup>C-NMR see Table S1.

Compound (+)-**7**. TLC (petrol ether / diethyl ether = 5 / 1): *R*<sub>f</sub> = 0.38; yield: 30 mg, 0.14 mmol (22%); optical rotation: [α]<sub>D</sub><sup>25</sup> = +95.9 (c 0.15, benzene); GC (HP-5MS): *I* = 1641; <sup>1</sup>H-NMR and <sup>13</sup>C-NMR see Table S2.

Compound (–)-**7**. TLC (petrol ether / diethyl ether = 5 / 1): *R*<sub>f</sub> = 0.38; yield: 30 mg, 0.14 mmol (22%); optical rotation: [α]<sub>D</sub><sup>25</sup> = –106.3 (c 0.14, benzene), lit: [α]<sub>D</sub> = –31.2 (CHCl<sub>3</sub>);<sup>1</sup> GC (HP-5MS): *I* = 1641; <sup>1</sup>H-NMR and <sup>13</sup>C-NMR see Table S2.

Compound **8**. TLC (petrol ether / diethyl ether = 5 / 1): *R*<sub>f</sub> = 0.71; yield: 7.0 mg, 0.03 mmol (5%); GC (HP-5MS): *I* = 1665; <sup>1</sup>H-NMR and <sup>13</sup>C-NMR see Table S3.

## HPLC

Analytical scale HPLC separation was carried out using an Azura series HPLC system (Knauer, Berlin, Germany), equipped with DAD 6.1L photodiode array detector (190–1020 nm) and a Daicel (Tokyo, Japan) Chiralpak IC-U column (1.6 μm; 3.0 mm × 100 mm) using an isocratic solvent mixture of [*n*-heptane / 2-propanol (98:2)] with 0.85 mL min<sup>–1</sup> (352 bar). The UV–Vis absorption was monitored at 210 nm.

Preparative scale HPLC purification was performed on an Azura series HPLC system (Knauer, Berlin, Germany) with a multi wavelength detector MWL 2.1L (190–700 nm) using a YMC ChiralART Cellulose-SC column (5 μm, 250 × 20 mm). The solvent mixture [*n*-heptane / 2-propanol (98:2)] was used at 18.0 mL min<sup>–1</sup> (44 bar) and monitoring was conducted at 210 nm.

## NMR spectroscopy

NMR spectra were recorded at 298 K on a Bruker (Billerica, MA, USA) Avance III HD Cryo (700 MHz) NMR spectrometer. Spectra were measured in C<sub>6</sub>D<sub>6</sub> and referenced against solvent signals (<sup>1</sup>H-NMR, residual proton signal: δ = 7.16 ppm; <sup>13</sup>C-NMR: δ = 128.06 ppm).<sup>2</sup>

## GC/MS analyses

GC/MS analyses were carried out using a 7890B GC equipped with a HP5-MS fused silica capillary column (30 m, 0.25 mm i. d., 0.50 μm film) and connected to a 5977A mass detector

(Agilent). GC parameters: 1) temperature program: 5 min at 50 °C increasing at 5 °C min<sup>-1</sup> to 320 °C, 2) injection volume: 2 μL, 3) split ratio: 10:1, 60 s valve time, and 4) carrier gas: He at 1 mL min<sup>-1</sup>. Retention indices (*I*) were determined from a homologous series of *n*-alkanes (C<sub>7</sub>-C<sub>40</sub>). MS parameters: 1) inlet pressure: 77.1 kPa, He at 23.3 mL min<sup>-1</sup>, 2) transfer line: 250 °C, and 3) electron energy: 70 eV.

### **Optical rotations**

Optical rotations were recorded on a Modular Compact Polarimeter MCP 100 (Anton Paar, Graz, Austria). The temperature setting was 25 °C; the wavelength of the light used was 589 nm (the sodium D line); the path-length was 10 cm, the compound concentrations *c* are given in g 100 mL<sup>-1</sup>.

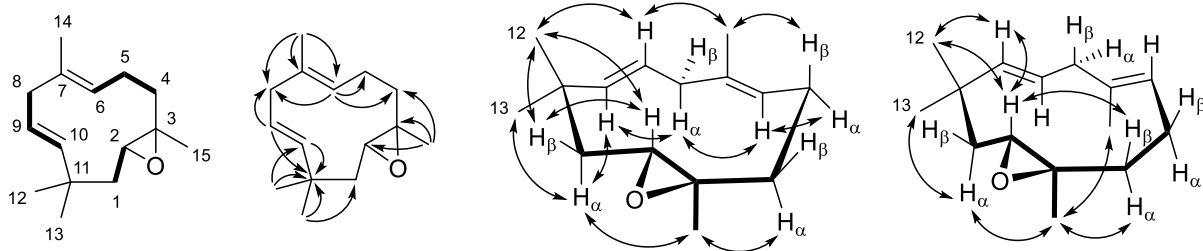

**Figure S1.** Structure elucidation of **6**. Bold lines: COSY correlations, single headed arrows: key HMBC correlations, double headed arrows: key NOESY correlations. The observed NOESY correlations point to the presence of several conformers.

**Table S1.** NMR data of humulene epoxide I (**6**) in  $C_6D_6$  recorded at 298 K.

| $C^{[a]}$ | type   | $^1H^{[b]}$                                                                   | $^{13}C^{[b]}$ |
|-----------|--------|-------------------------------------------------------------------------------|----------------|
| 1         | $CH_2$ | 1.65 (d, $J = 14.2$ , $H_\beta$ )<br>1.36 (dd, $J = 14.2$ , 9.8, $H_\alpha$ ) | 41.78          |
| 2         | CH     | 2.53 (d, $J = 9.6$ )                                                          | 62.87          |
| 3         | $C_q$  | –                                                                             | 60.62          |
| 4         | $CH_2$ | 2.02 (m, $H_\alpha$ )<br>1.15 (ddd, $J = 12.4$ , 12.4, 5.6, $H_\beta$ )       | 39.12          |
| 5         | $CH_2$ | 2.01 (m, $H_\beta$ )<br>1.91 (m, $H_\alpha$ )                                 | 23.75          |
| 6         | CH     | 5.06 (br dd, $J = 8.9$ , 6.5)                                                 | 126.66         |
| 7         | $C_q$  | –                                                                             | 139.06         |
| 8         | $CH_2$ | 2.44 (d, $J = 7.3$ , 2H)                                                      | 39.90          |
| 9         | CH     | 5.60 (ddd, $J = 15.8$ , 7.2, 7.2)                                             | 128.25         |
| 10        | CH     | 5.24 (d, $J = 15.8$ )                                                         | 141.66         |
| 11        | $C_q$  | –                                                                             | 35.11          |
| 12        | $CH_3$ | 0.93 (s)                                                                      | 30.79          |
| 13        | $CH_3$ | 1.04 (s)                                                                      | 23.87          |
| 14        | $CH_3$ | 1.50 (br s)                                                                   | 18.10          |
| 15        | $CH_3$ | 1.08 (s)                                                                      | 16.37          |

[a] Carbon numbering as shown in Figure S1. [b] Chemical shifts  $\delta$  in ppm, multiplicity: s = singlet, d = doublet, m = multiplet, br = broad, coupling constants  $J$  are given in Hertz.

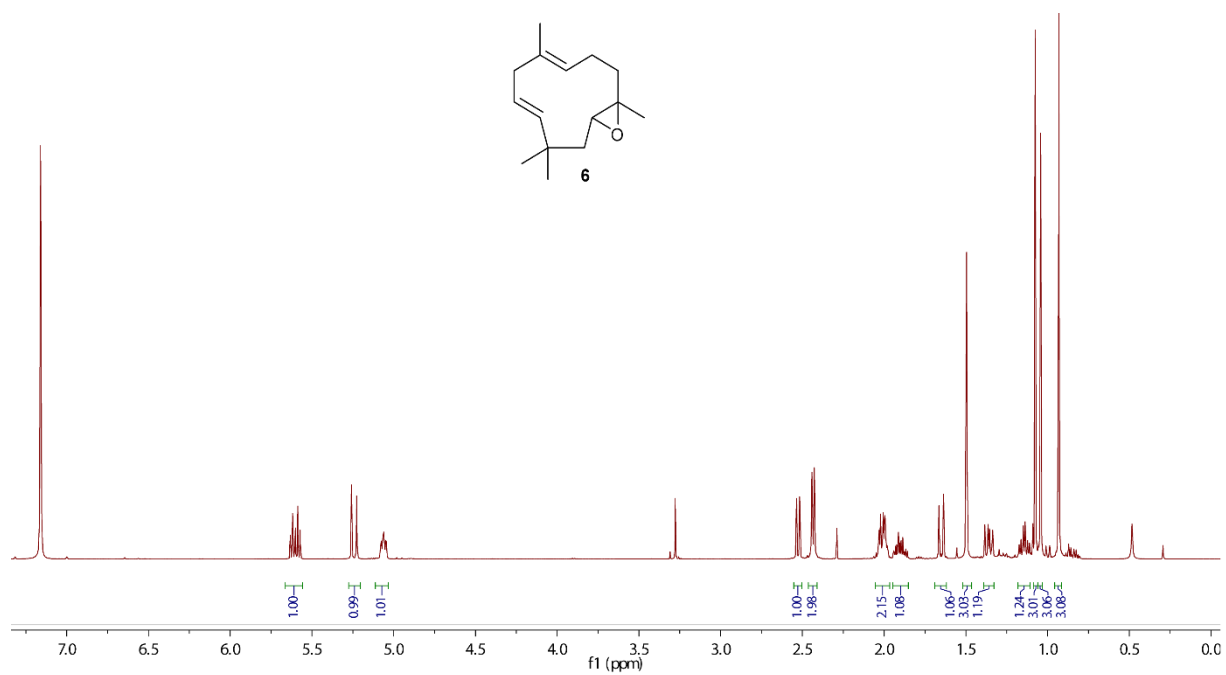

**Figure S2.** <sup>1</sup>H-NMR spectrum of **6** (700 MHz, C<sub>6</sub>D<sub>6</sub>).

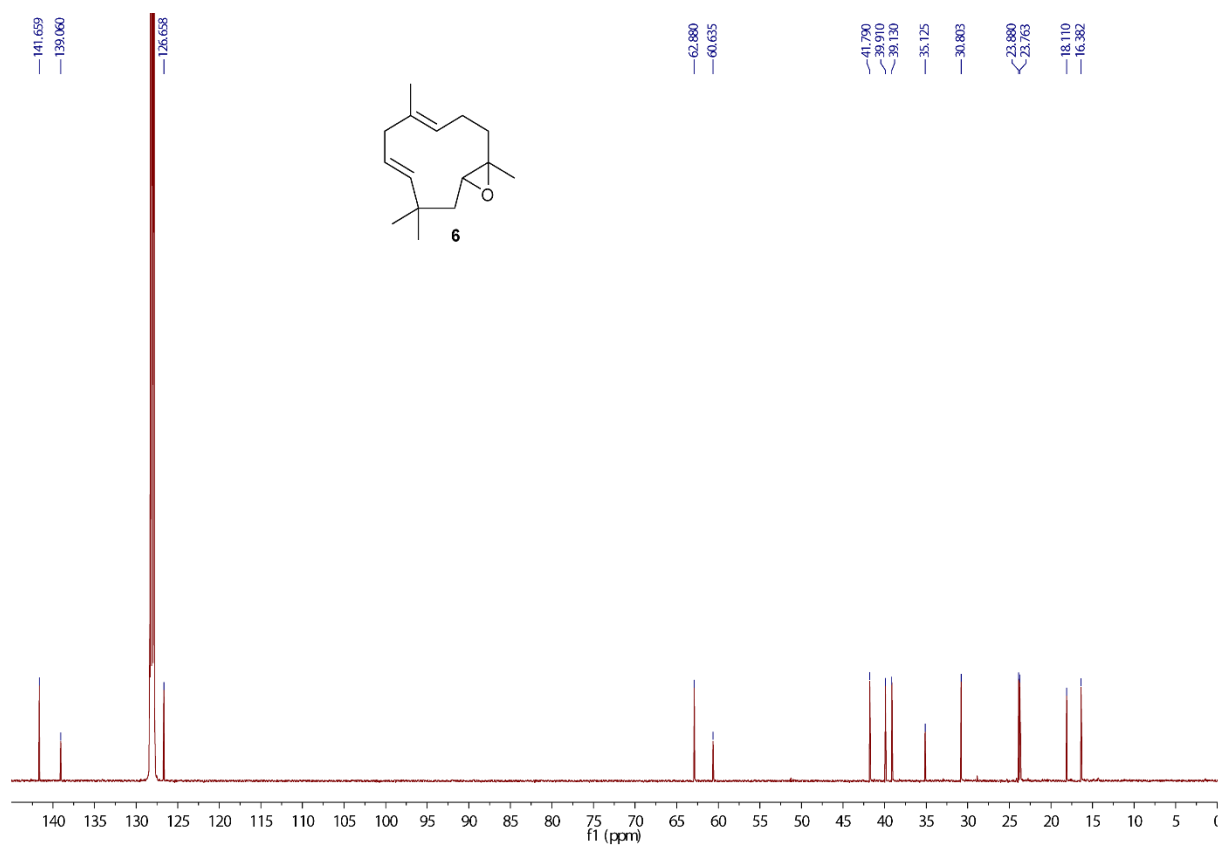

**Figure S3.** <sup>13</sup>C-NMR spectrum of **6** (176 MHz, C<sub>6</sub>D<sub>6</sub>).

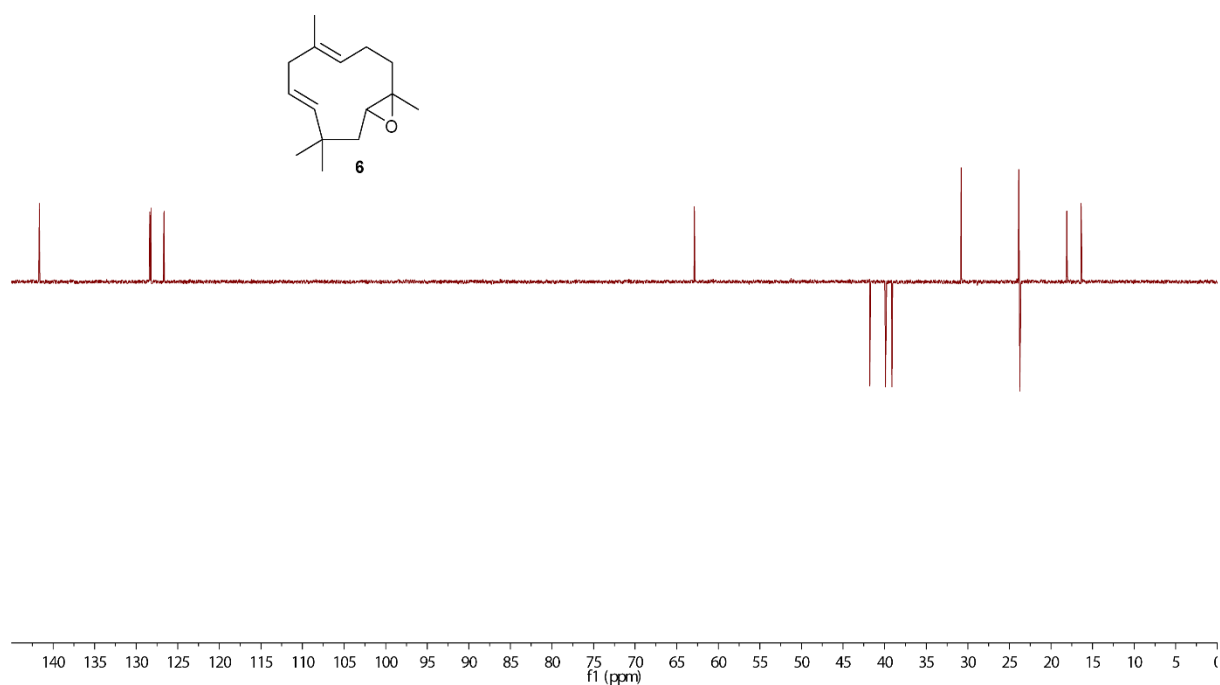

**Figure S4.** <sup>13</sup>C-DEPT spectrum of **6** (176 MHz, C<sub>6</sub>D<sub>6</sub>).

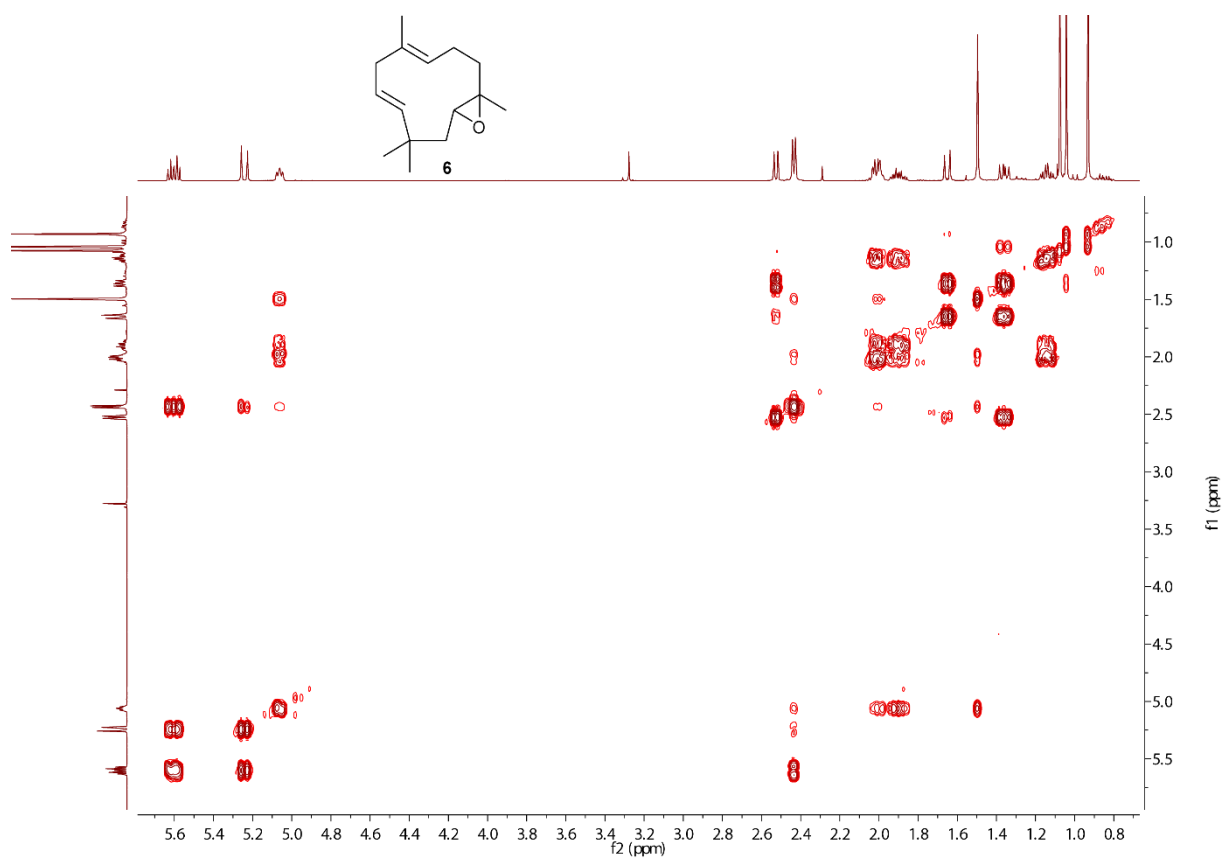

**Figure S5.**  $^1\text{H}$ - $^1\text{H}$  COSY spectrum of **6** (700 MHz,  $\text{C}_6\text{D}_6$ ).

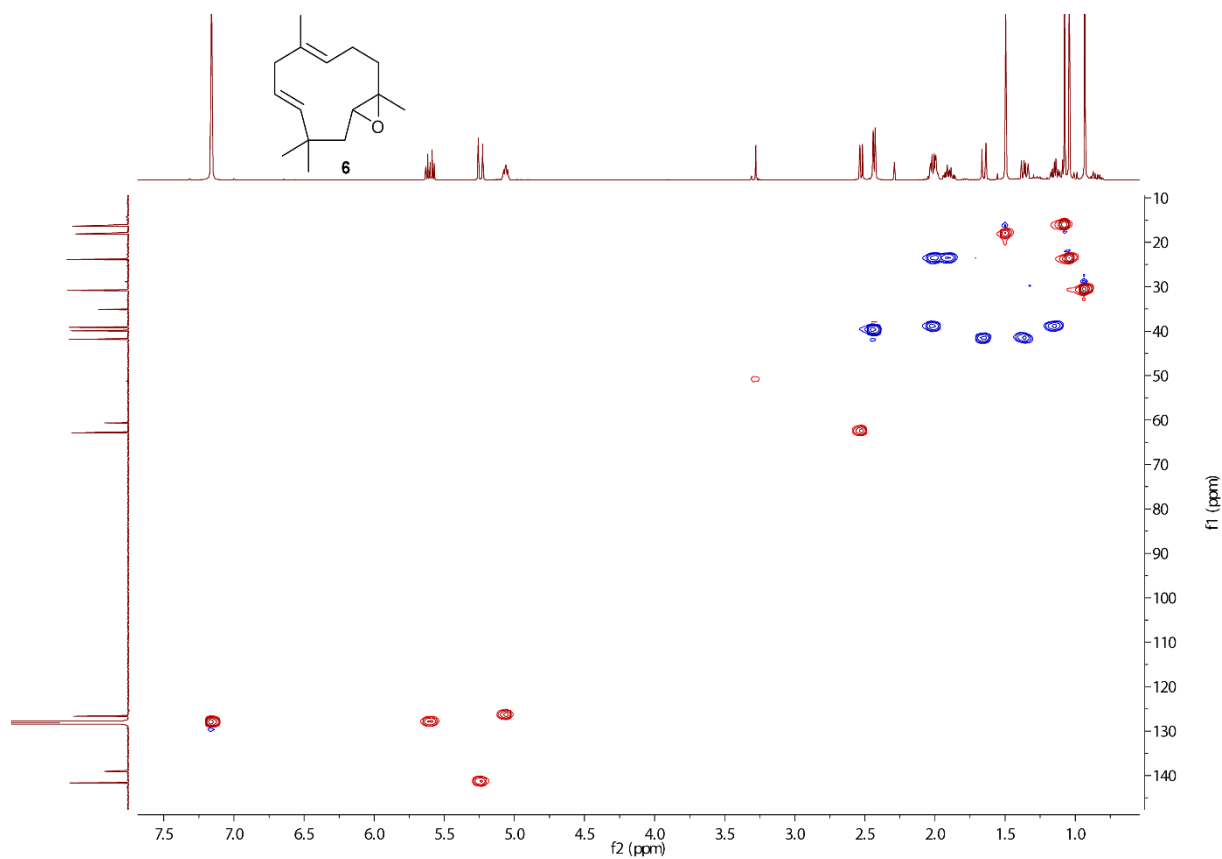

**Figure S6.** HSQC spectrum of **6** ( $\text{C}_6\text{D}_6$ ).

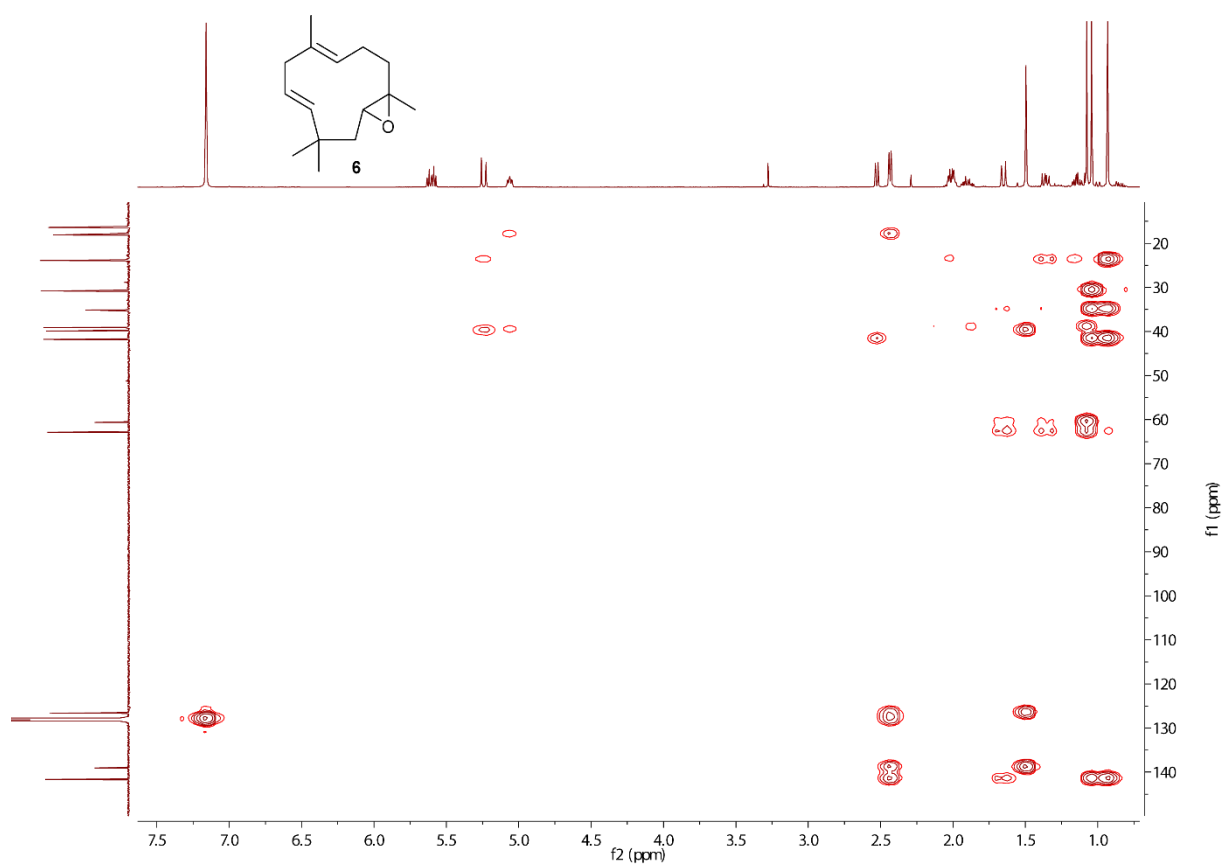

Figure S7. HMBC spectrum of **6** ( $C_6D_6$ ).

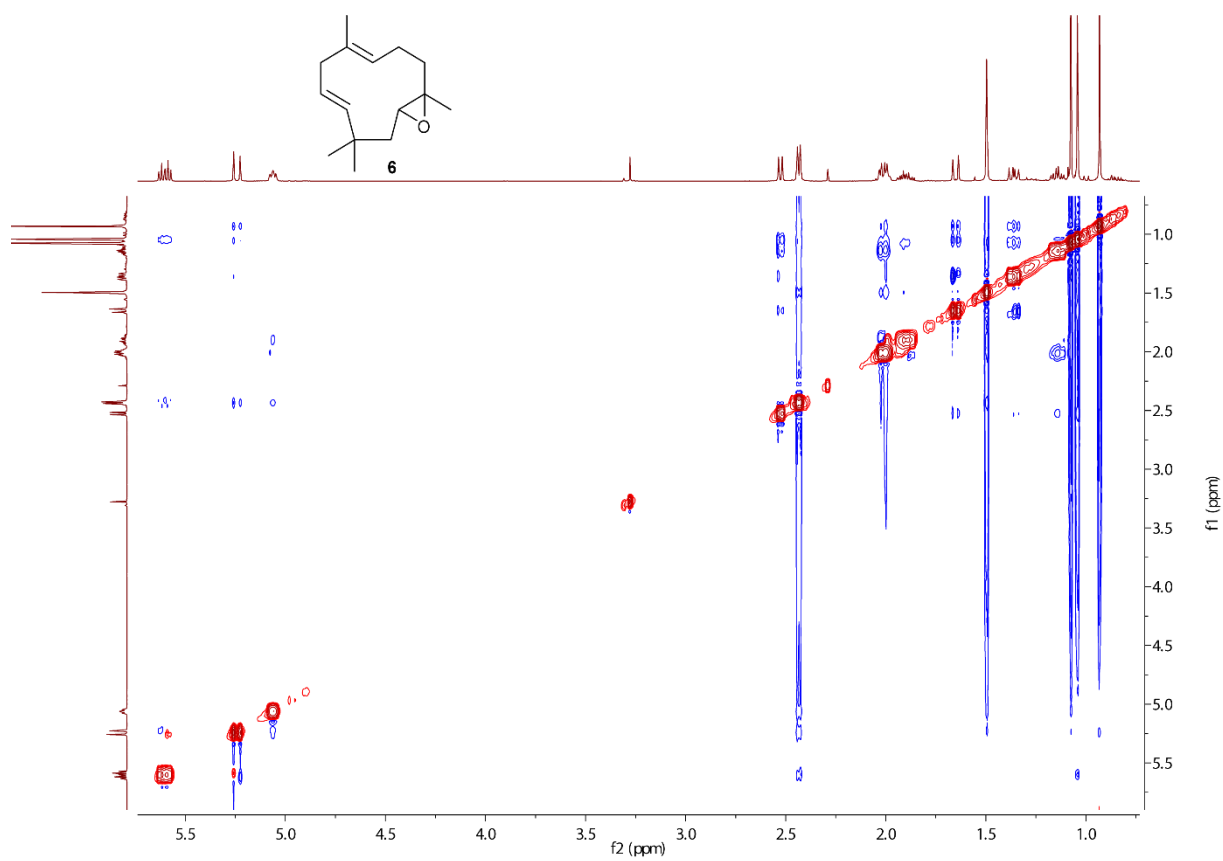

Figure S8. NOESY spectrum of **6** ( $C_6D_6$ ).

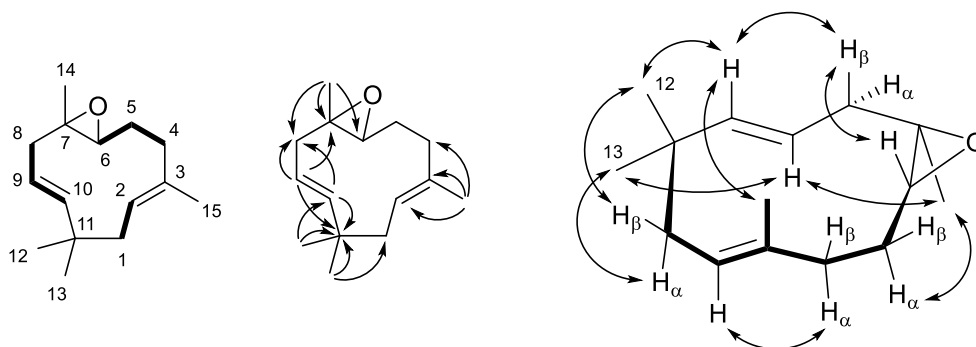

**Figure S9.** Structure elucidation of **7**. Bold lines: COSY correlations, single headed arrows: key HMBC correlations, double headed arrows: key NOESY correlations.

**Table S2.** NMR data of humulene epoxide II (**7**) in  $C_6D_6$  recorded at 298 K.

| C <sup>[a]</sup> | type            | <sup>1</sup> H <sup>[b]</sup>                                                                   | <sup>13</sup> C <sup>[b]</sup> |
|------------------|-----------------|-------------------------------------------------------------------------------------------------|--------------------------------|
| 1                | CH <sub>2</sub> | 1.87 (dd, $J = 13.6, 9.0$ , H <sub>β</sub> )<br>1.77 (br dd, $J = 13.7, 5.9$ , H <sub>α</sub> ) | 40.59                          |
| 2                | CH              | 4.88 (m)                                                                                        | 125.76                         |
| 3                | C <sub>q</sub>  | –                                                                                               | 132.01                         |
| 4                | CH <sub>2</sub> | 2.00 (m, H <sub>β</sub> )<br>1.93 (m, H <sub>α</sub> )                                          | 36.99                          |
| 5                | CH <sub>2</sub> | 2.01 (m, H <sub>β</sub> )<br>1.26 (m, H <sub>α</sub> )                                          | 25.28                          |
| 6                | CH              | 2.39 (dd, $J = 10.1, 3.6$ )                                                                     | 61.23                          |
| 7                | C <sub>q</sub>  | –                                                                                               | 62.51                          |
| 8                | CH <sub>2</sub> | 2.47 (dd, $J = 12.5, 5.4$ , H <sub>α</sub> )<br>1.69 (dd, $J = 12.5, 10.5$ , H <sub>β</sub> )   | 43.02                          |
| 9                | CH              | 5.12 (ddd, $J = 15.9, 10.1, 5.3$ )                                                              | 122.94                         |
| 10               | CH              | 4.96 (d, $J = 16.0$ )                                                                           | 142.64                         |
| 11               | C <sub>q</sub>  | –                                                                                               | 36.47                          |
| 12               | CH <sub>3</sub> | 0.98 (s)                                                                                        | 29.06                          |
| 13               | CH <sub>3</sub> | 1.01 (s)                                                                                        | 25.83                          |
| 14               | CH <sub>3</sub> | 1.13 (br s)                                                                                     | 17.49                          |
| 15               | CH <sub>3</sub> | 1.34 (br s)                                                                                     | 15.06                          |

[a] Carbon numbering as shown in Figure S9. [b] Chemical shifts  $\delta$  in ppm, multiplicity: s = singlet, d = doublet, m = multiplet, br = broad, coupling constants  $J$  are given in Hertz.



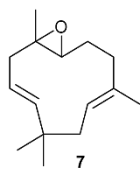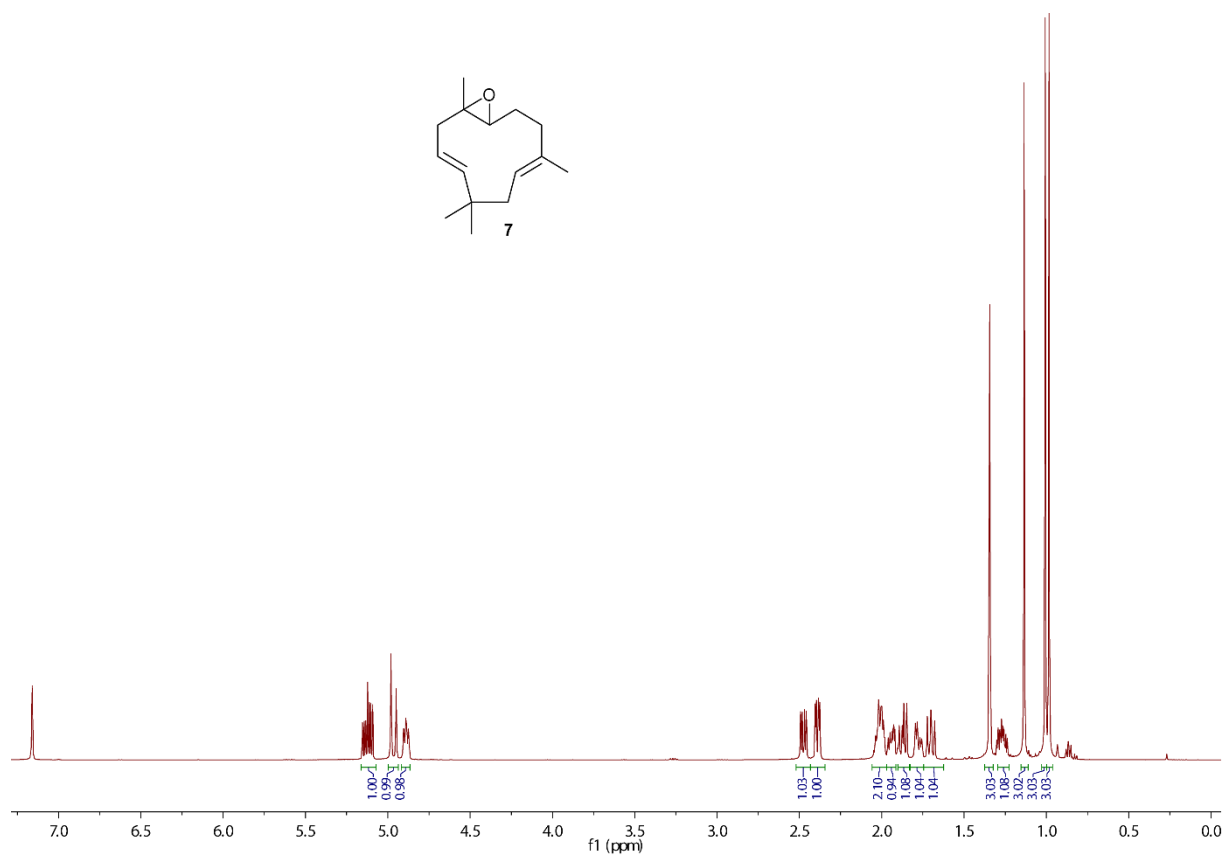

**Figure S10.**  $^1\text{H-NMR}$  spectrum of **7** (700 MHz,  $\text{C}_6\text{D}_6$ ).

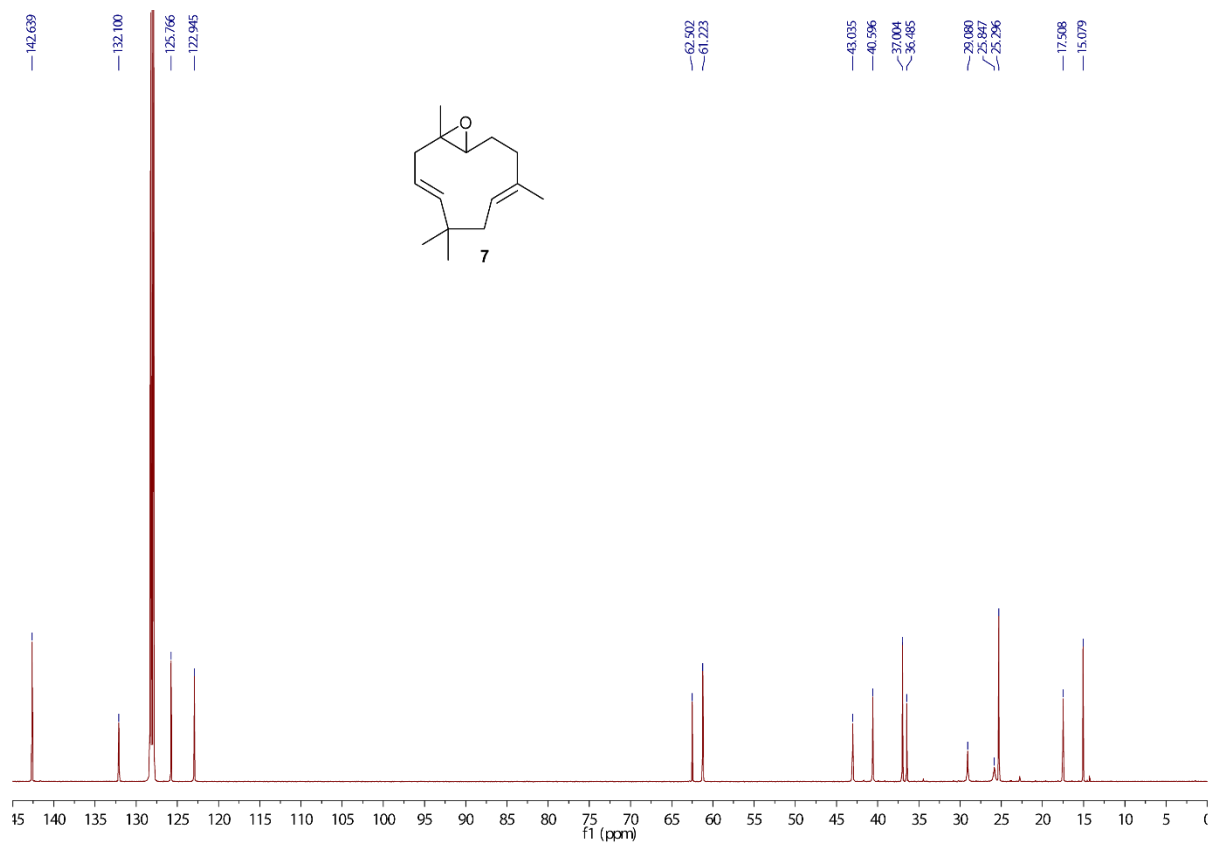

**Figure S11.**  $^{13}\text{C}$ -NMR spectrum of **7** (176 MHz,  $\text{C}_6\text{D}_6$ ).

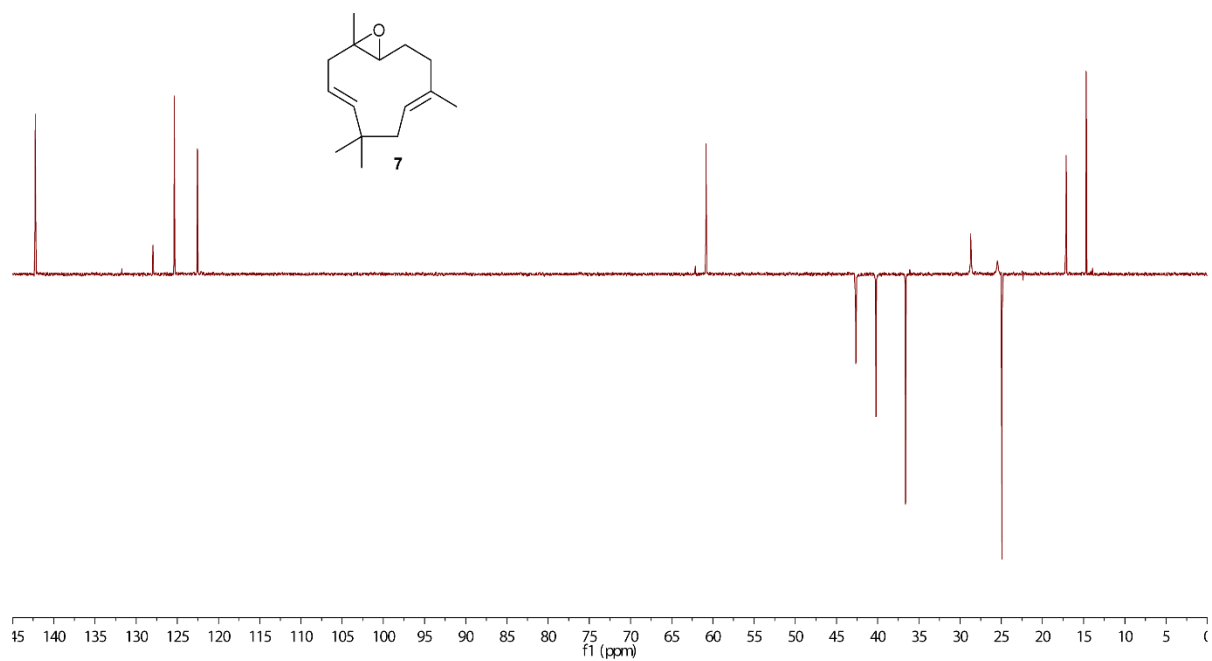

**Figure S12.**  $^{13}\text{C}$ -DEPT spectrum of **7** (176 MHz,  $\text{C}_6\text{D}_6$ ).

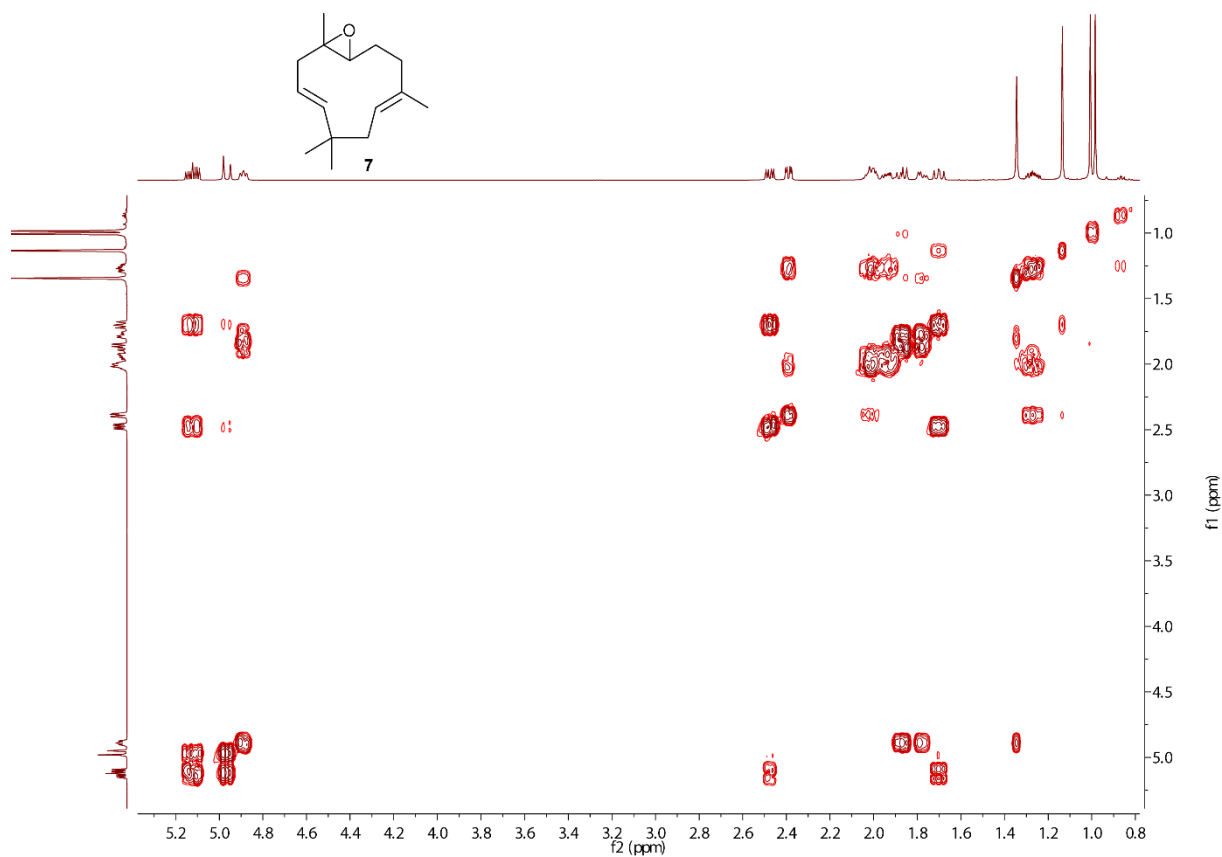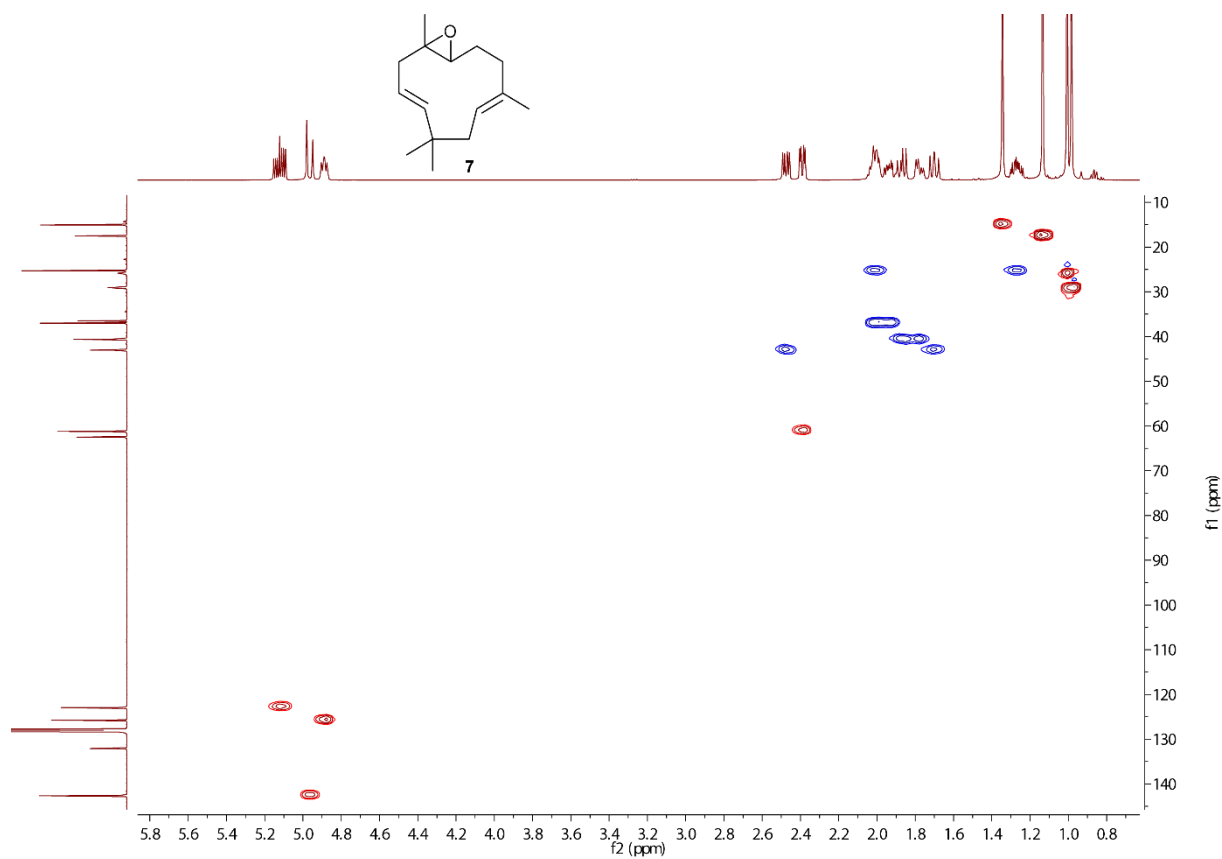

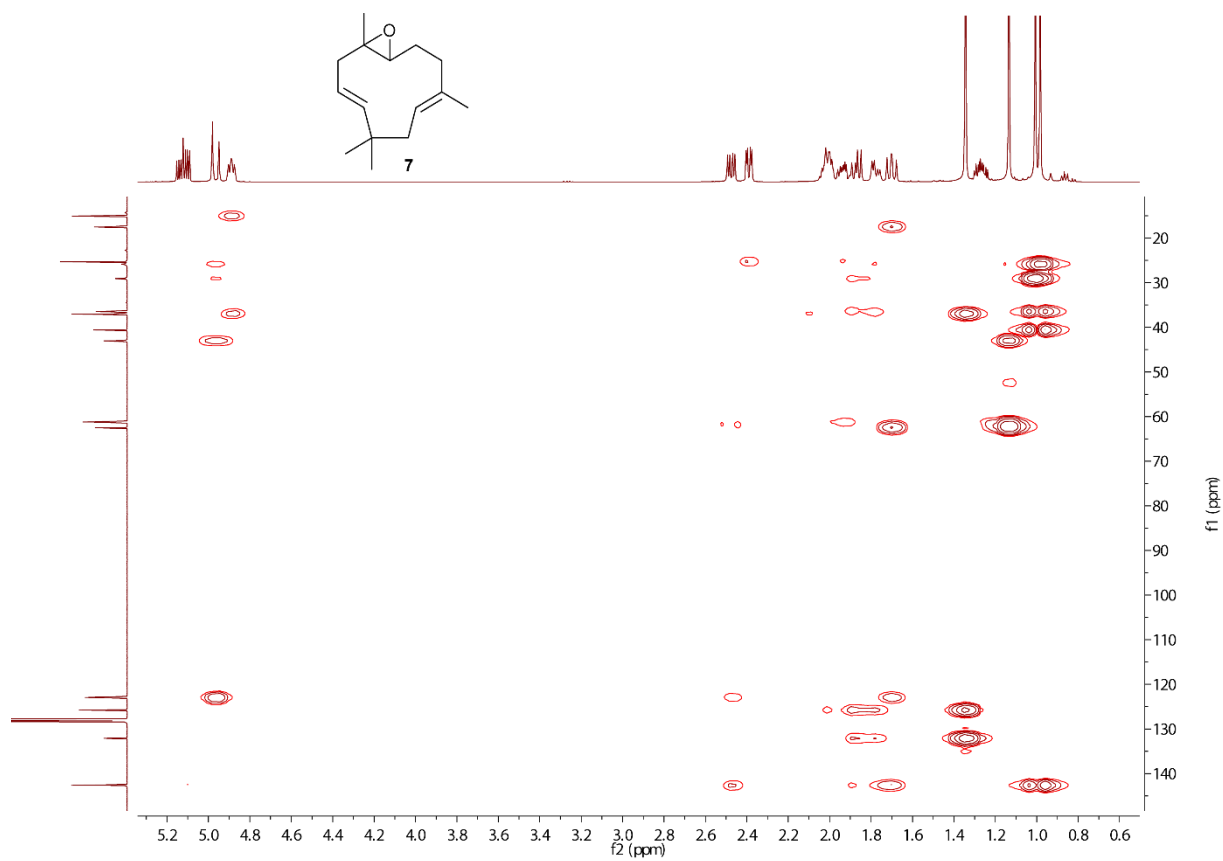

**Figure S15.** HMBC spectrum of **7** ( $C_6D_6$ ).

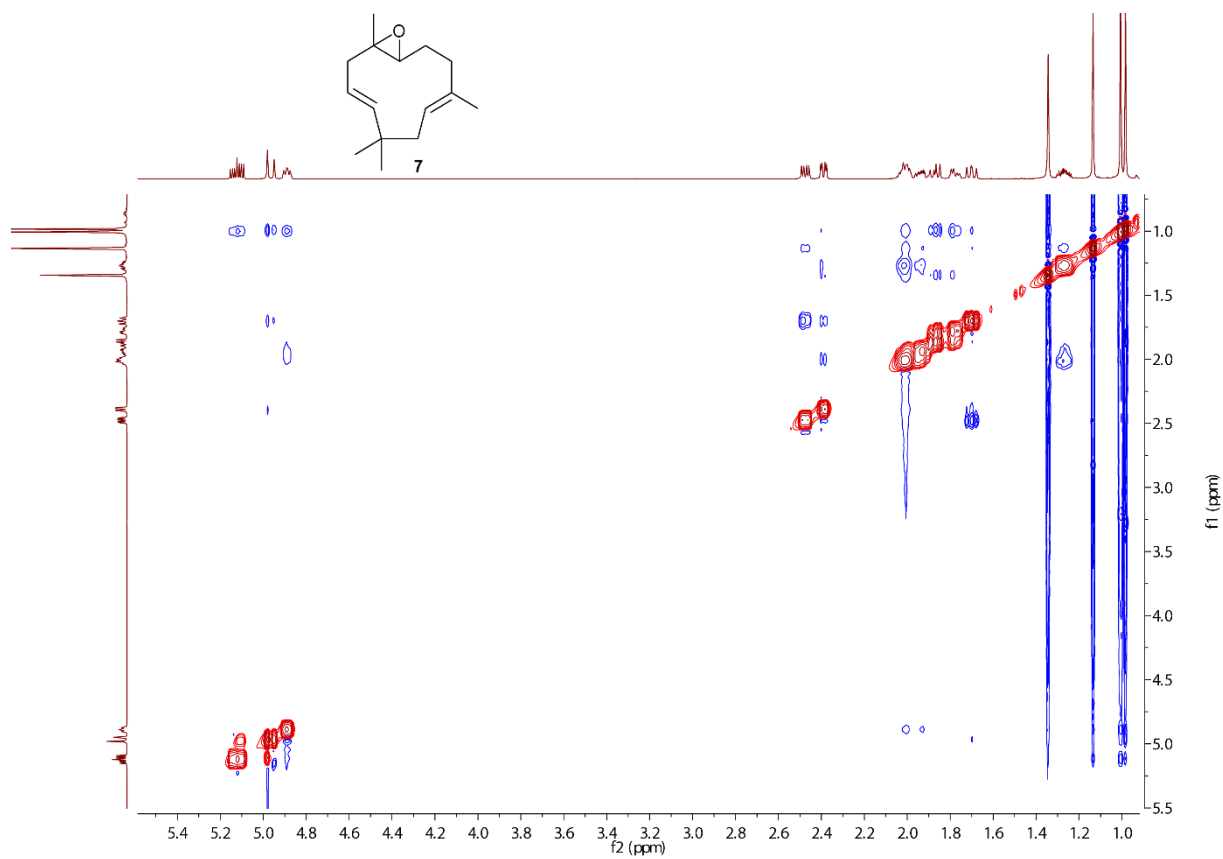

**Figure S16.** NOESY spectrum of **7** ( $C_6D_6$ ).

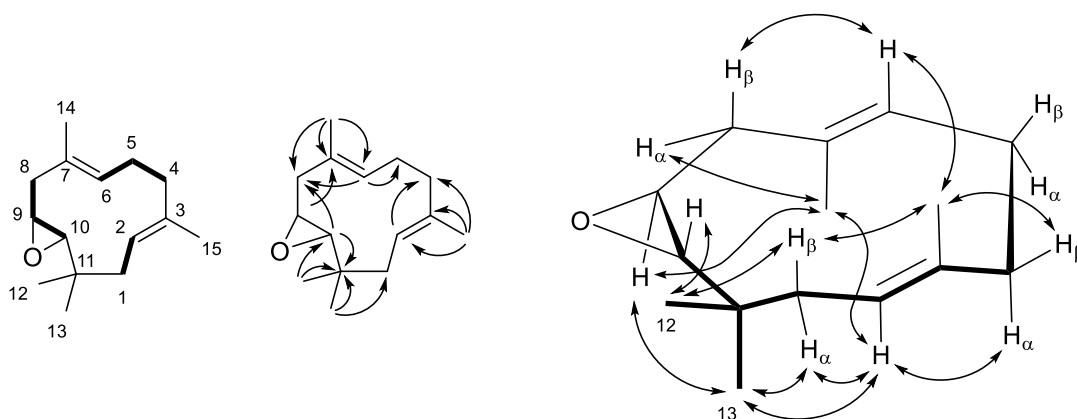

**Figure S17.** Structure elucidation of **8**. Bold lines: COSY correlations, single headed arrows: key HMBC correlations, double headed arrows: key NOESY correlations.

**Table S3.** NMR data of humulene epoxide III (**8**) in  $C_6D_6$  recorded at 298 K.

| $C^{[a]}$ | type   | $^1H^{[b]}$                                                                         | $^{13}C^{[b]}$ |
|-----------|--------|-------------------------------------------------------------------------------------|----------------|
| 1         | $CH_2$ | 2.11 (dd, $J = 14.6, 10.8$ , $H_\beta$ )<br>1.79 (dm, $J = 14.6$ , $H_\alpha$ )     | 39.62          |
| 2         | CH     | 4.87 (br dd, $J = 7.1, 7.1$ )                                                       | 123.63         |
| 3         | $C_q$  | –                                                                                   | 133.41         |
| 4         | $CH_2$ | 2.02 (m, $H_\beta$ )<br>1.91 (m, $H_\alpha$ )                                       | 39.51          |
| 5         | $CH_2$ | 1.99 (m, 2H)                                                                        | 23.72          |
| 6         | CH     | 4.81 (dm, $J = 10.4$ )                                                              | 126.47         |
| 7         | $C_q$  | –                                                                                   | 132.12         |
| 8         | $CH_2$ | 2.64 (dd, $J = 12.8, 4.2$ , $H_\alpha$ )<br>1.54 (dd, $J = 12.8, 9.4$ , $H_\beta$ ) | 42.49          |
| 9         | CH     | 2.80 (ddd, $J = 9.5, 4.3, 2.3$ )                                                    | 56.53          |
| 10        | CH     | 2.19 (d, $J = 2.3$ )                                                                | 64.79          |
| 11        | $C_q$  | –                                                                                   | 34.59          |
| 12        | $CH_3$ | 1.10 (s)                                                                            | 29.15          |
| 13        | $CH_3$ | 0.74 (s)                                                                            | 19.28          |
| 14        | $CH_3$ | 1.40 (br s)                                                                         | 17.84          |
| 15        | $CH_3$ | 1.36 (dd, $J = 1.4, 1.4$ )                                                          | 15.36          |

[a] Carbon numbering as shown in Figure S17. [b] Chemical shifts  $\delta$  in ppm, multiplicity: s = singlet, d = doublet, m = multiplet, br = broad, coupling constants  $J$  are given in Hertz.

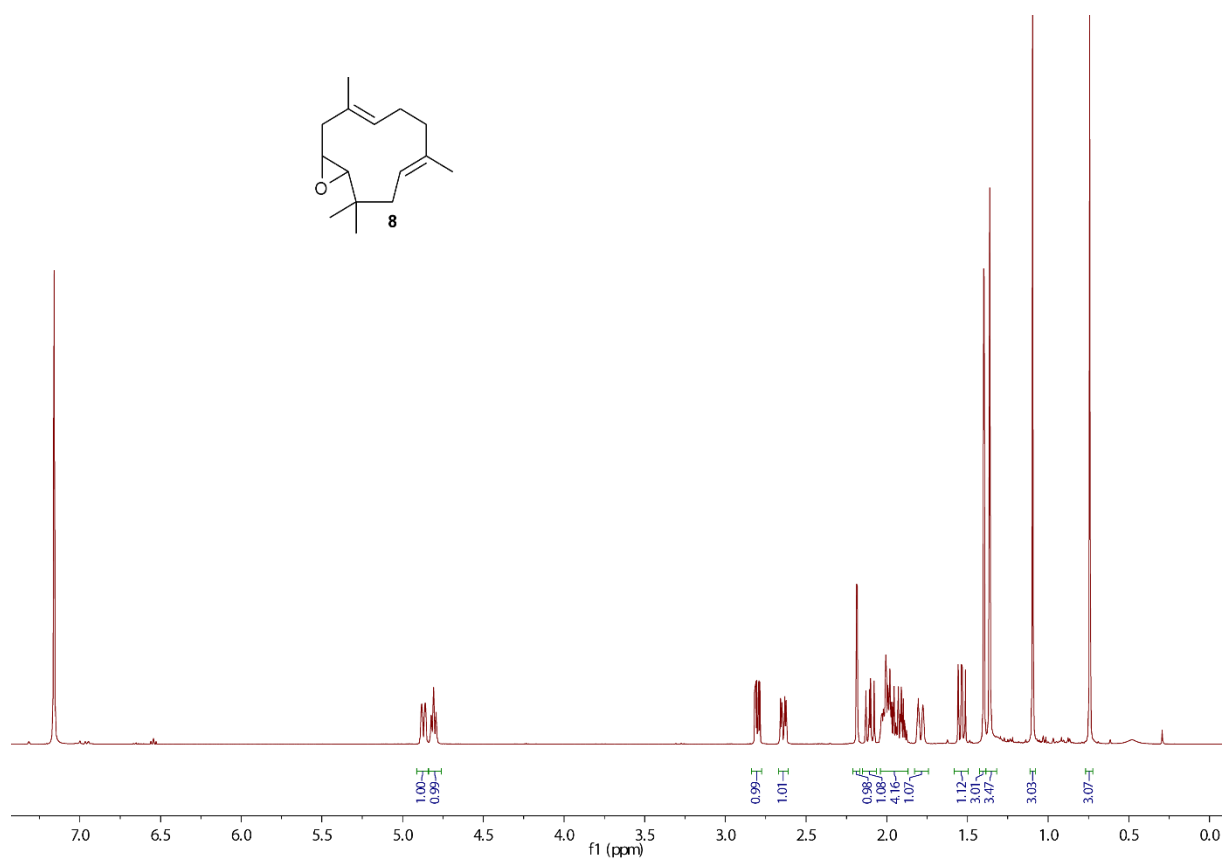

**Figure S18.** <sup>1</sup>H-NMR spectrum of **8** (700 MHz, C<sub>6</sub>D<sub>6</sub>).

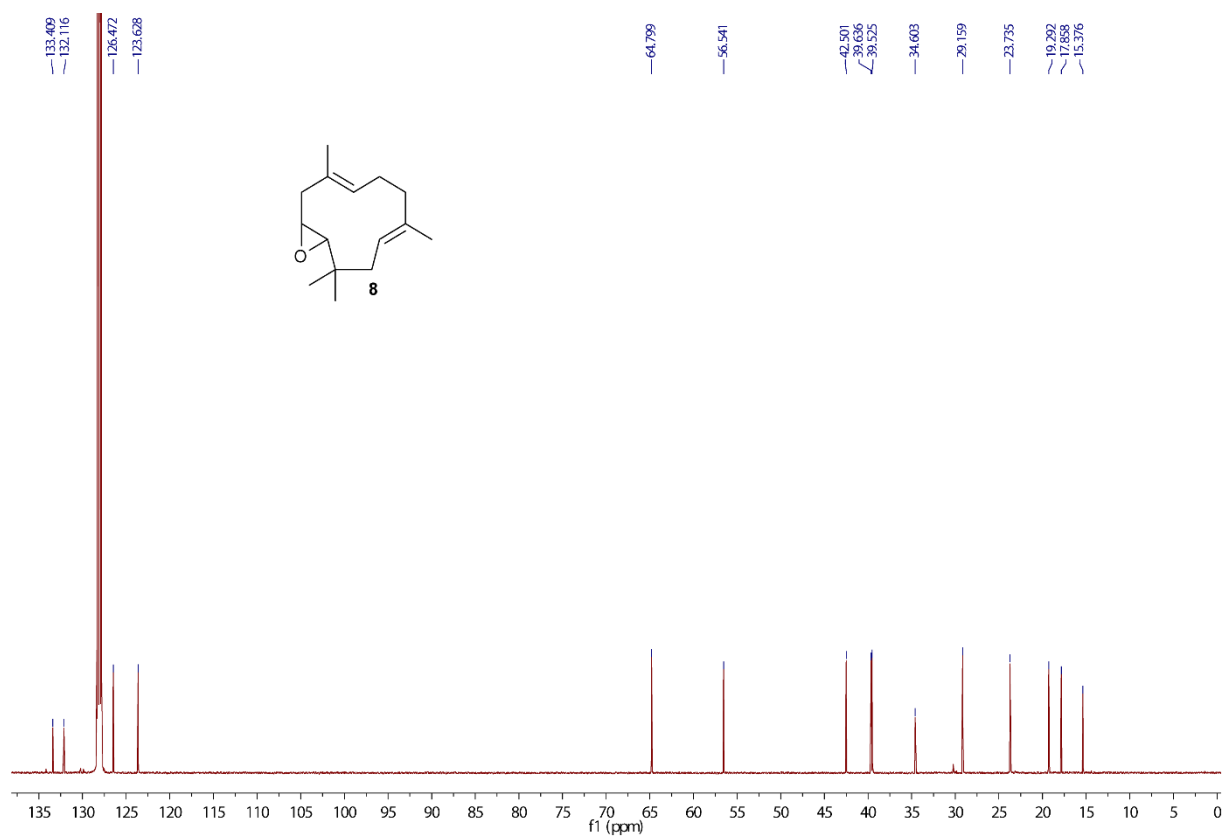

**Figure S19.** <sup>13</sup>C-NMR spectrum of **8** (176 MHz, C<sub>6</sub>D<sub>6</sub>).

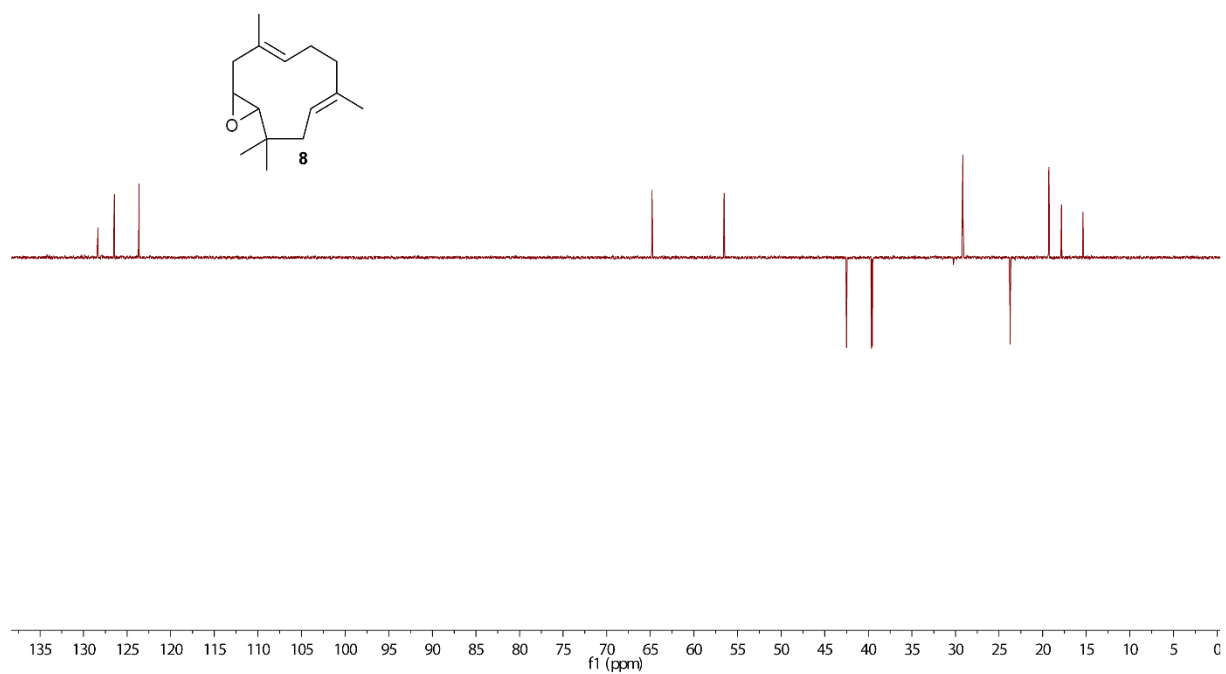

**Figure S20.** <sup>13</sup>C-DEPT spectrum of **8** (176 MHz, C<sub>6</sub>D<sub>6</sub>).

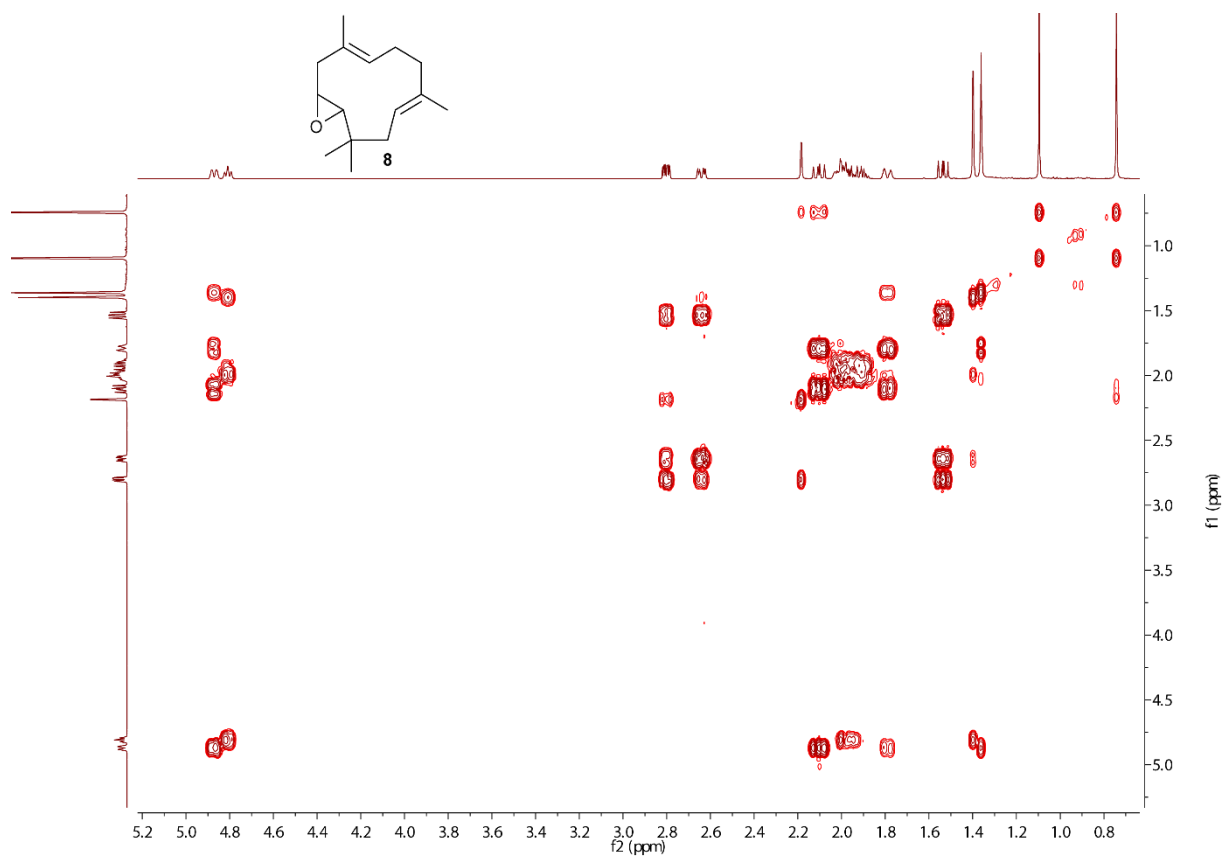

**Figure S21.**  $^1\text{H}$ - $^1\text{H}$  COSY spectrum of **8** (700 MHz,  $\text{C}_6\text{D}_6$ ).

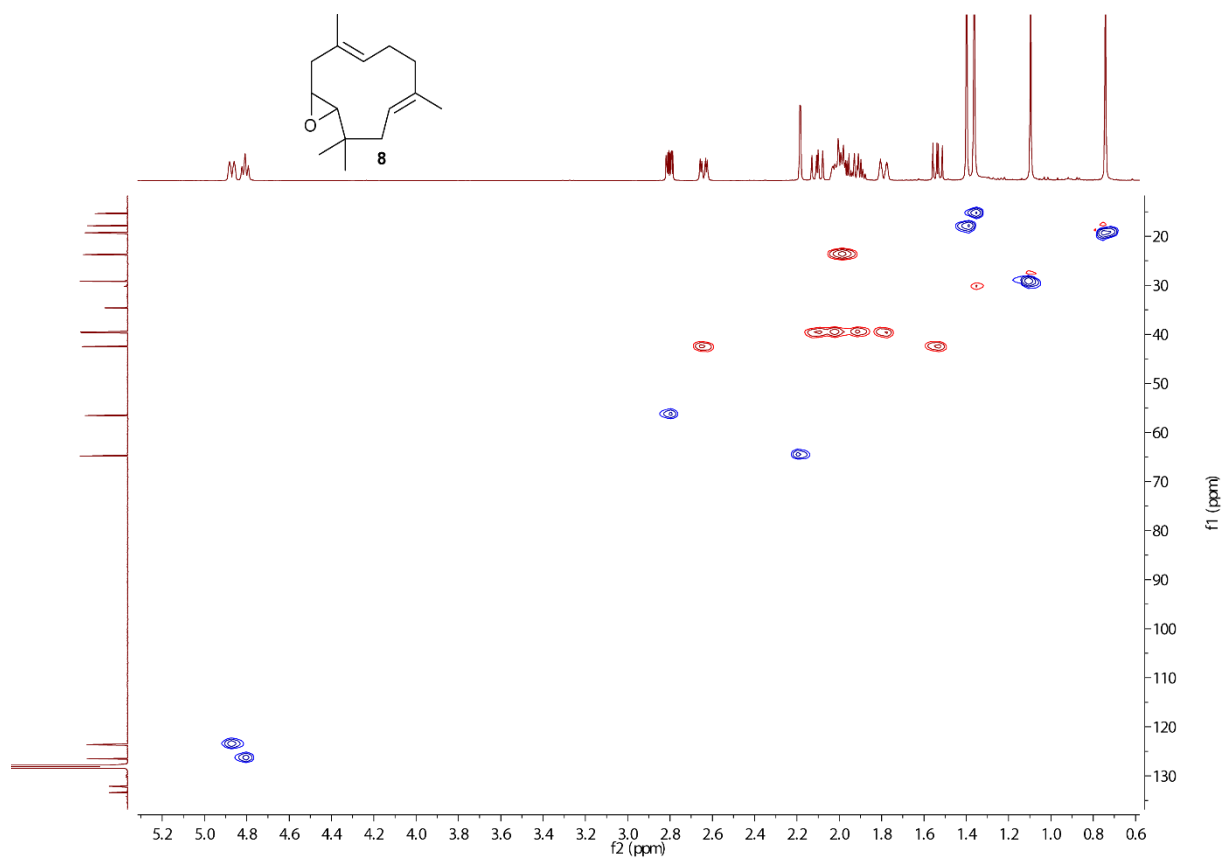

**Figure S22.** HSQC spectrum of **8** ( $\text{C}_6\text{D}_6$ ).



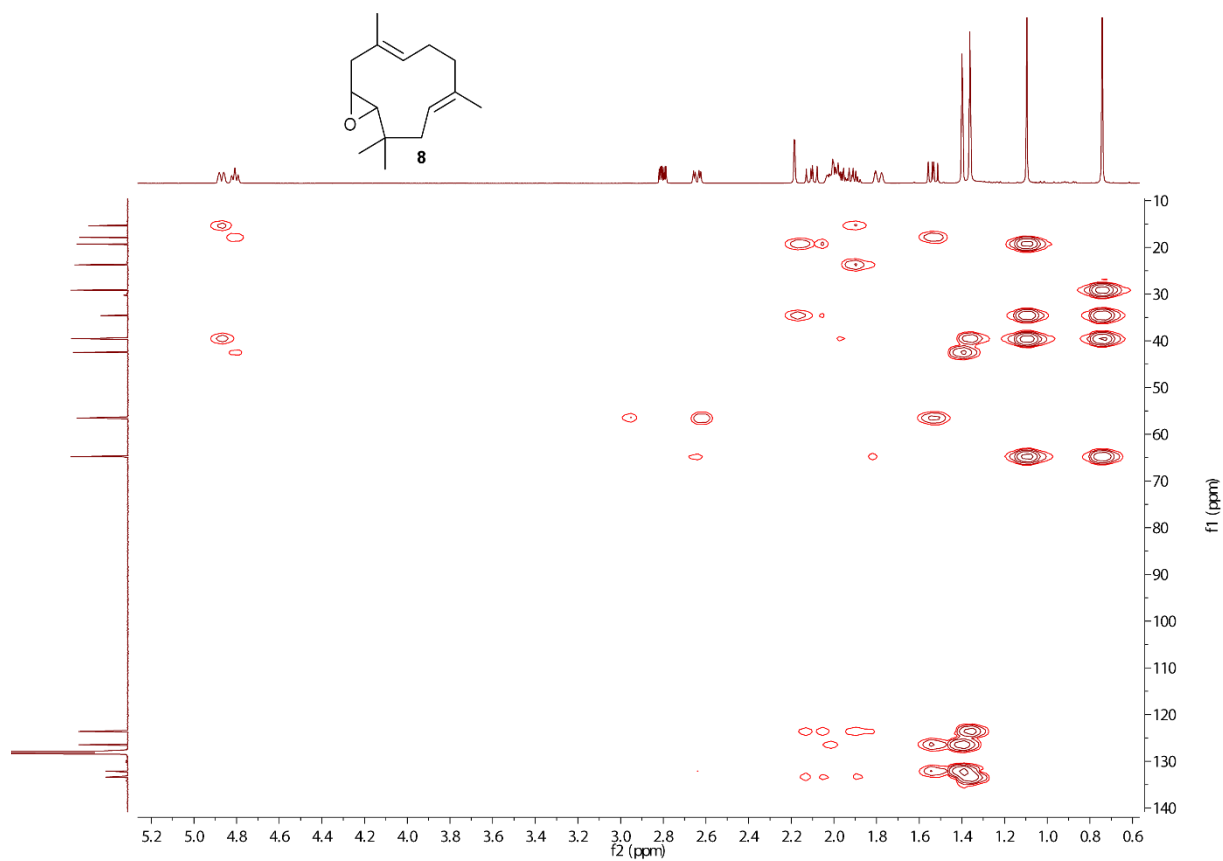

Figure S23. HMBC spectrum of **8** ( $C_6D_6$ ).

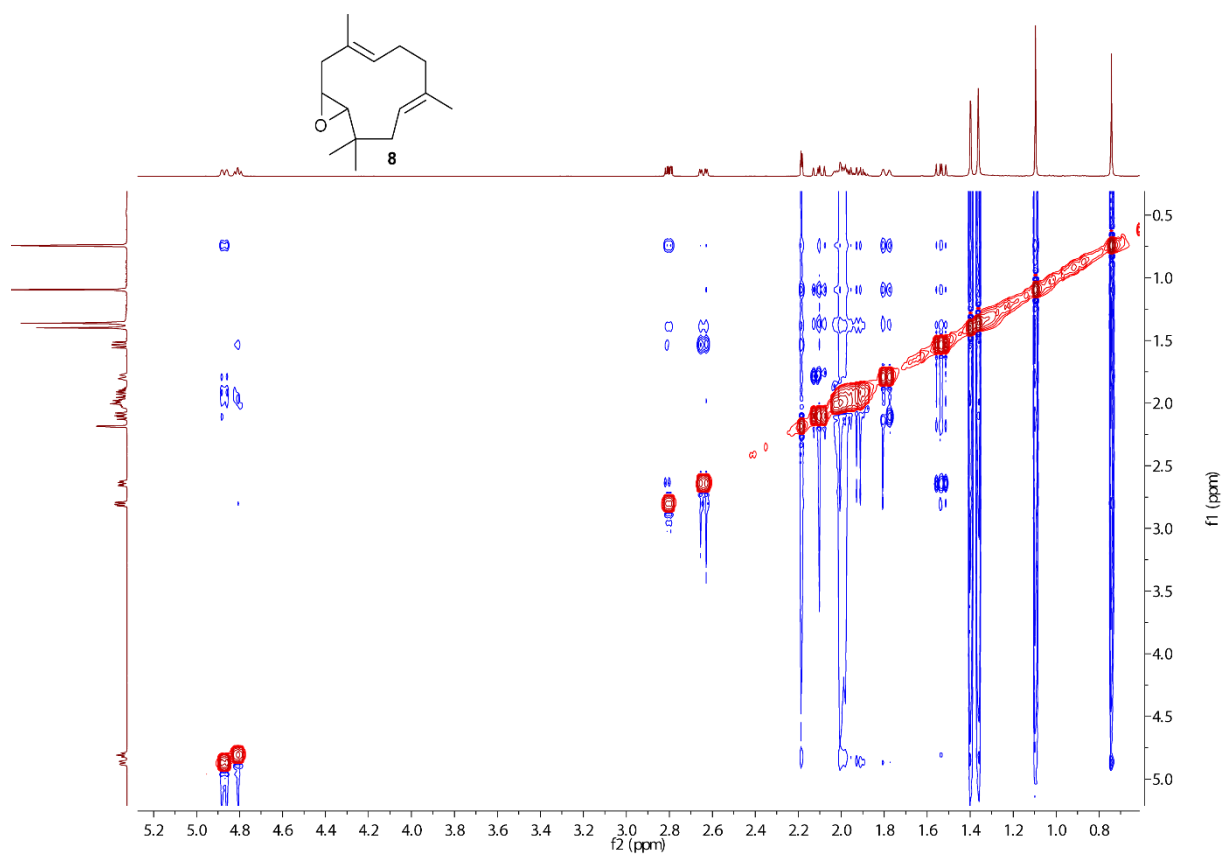

Figure S24. NOESY spectrum of **8** ( $C_6D_6$ ).

### Isotopic labelling experiments

Isotopic labelling experiments were performed with the substrates and enzymes as listed in Table S4.

For the reactions entries 1 – 4, the reaction mixtures contained substrates (5 mg each) in aqueous  $\text{NH}_4\text{HCO}_3$  solution (2 mL, 25 mM), enzyme elution fractions (5 mL each) purified as reported<sup>3</sup> and incubation buffer (13 mL, 50 mM Tris, 10 mM  $\text{MgCl}_2$ , 20 vol-% glycerol, pH 8.2). After incubation with shaking at 28 °C overnight, the reaction mixtures were extracted with diethyl ether (50 mL).  $\alpha$ -Humulene (30 mg) was added and the solvent was evaporated, followed by conversion with mCPBA into epoxides and separation of stereoisomers by HPLC on a chiral stationary phase to obtain (1*S*,6*S*,7*S*)-[1-<sup>13</sup>C,1-<sup>2</sup>H]-**7** and (1*S*,6*R*,7*R*)-[1-<sup>13</sup>C,1-<sup>2</sup>H]-**7** from experiment 1, (1*R*,6*S*,7*S*)-[1-<sup>13</sup>C,1-<sup>2</sup>H]-**7** and (1*R*,6*R*,7*R*)-[1-<sup>13</sup>C,1-<sup>2</sup>H]-**7** from experiment 2, (6*S*,7*S*,11*R*)-[12-<sup>13</sup>C]-**7** and (6*R*,7*R*,11*R*)-[12-<sup>13</sup>C]-**7** from experiment 3, and (6*S*,7*S*,11*S*)-[12-<sup>13</sup>C]-**7** and (6*R*,7*R*,11*S*)-[12-<sup>13</sup>C]-**7** from experiment 4. All products were analysed by NMR spectroscopy.

For the reactions entries 5 and 6, the reaction mixtures contained substrates (0.5 mg each) in aqueous  $\text{NH}_4\text{HCO}_3$  solution (0.1 mL, 25 mM), enzyme elution fractions (0.2 mL each) and incubation buffer (0.5 mL). After incubation with shaking at 28 °C for 5 h, the reaction mixtures were extracted with *n*-hexane (0.15 mL). The extracts were dried over  $\text{MgSO}_4$  and analysed by GC-MS.

**Table S4.** Labelling experiments with AsR6.

| entry | substrate                                                           | enzymes                                   | results shown in |
|-------|---------------------------------------------------------------------|-------------------------------------------|------------------|
| 1     | ( <i>R</i> )-(1- <sup>13</sup> C,1- <sup>2</sup> H)FPP <sup>4</sup> | AsR6 <sup>5</sup>                         | Figure S25       |
| 2     | ( <i>S</i> )-(1- <sup>13</sup> C,1- <sup>2</sup> H)FPP <sup>4</sup> | AsR6                                      | Figure S25       |
| 3     | (12- <sup>13</sup> C)FPP <sup>6</sup>                               | AsR6                                      | Figure S26       |
| 4     | (13- <sup>13</sup> C)FPP <sup>6</sup>                               | AsR6                                      | Figure S26       |
| 5     | ( <i>R</i> )-(1- <sup>2</sup> H)IPP <sup>6</sup>                    | IDI, <sup>8</sup> FPPS, <sup>9</sup> AsR6 | Figure S27       |
| 6     | ( <i>S</i> )-(1- <sup>2</sup> H)IPP <sup>7</sup>                    | IDI, FPPS, AsR6                           | Figure S27       |

A) unlabelled

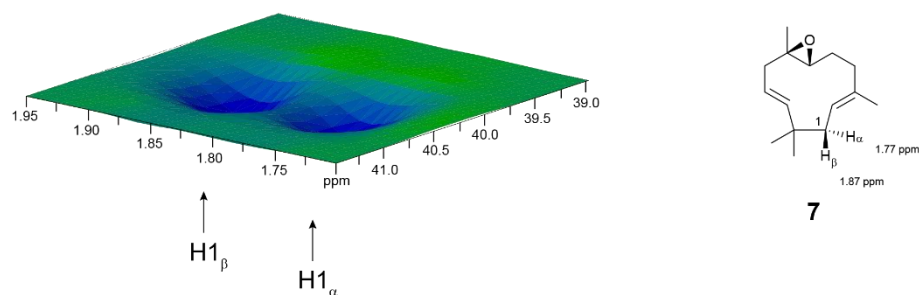

B) (*R*)-(1- $^{13}\text{C}$ ,1- $^2\text{H}$ )FPP

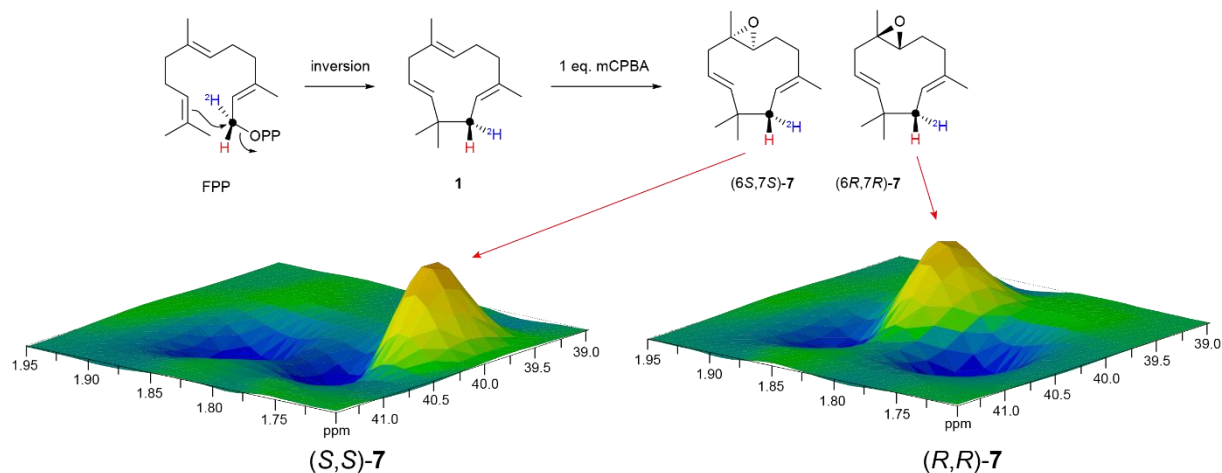

C) (*S*)-(1- $^{13}\text{C}$ ,1- $^2\text{H}$ )FPP

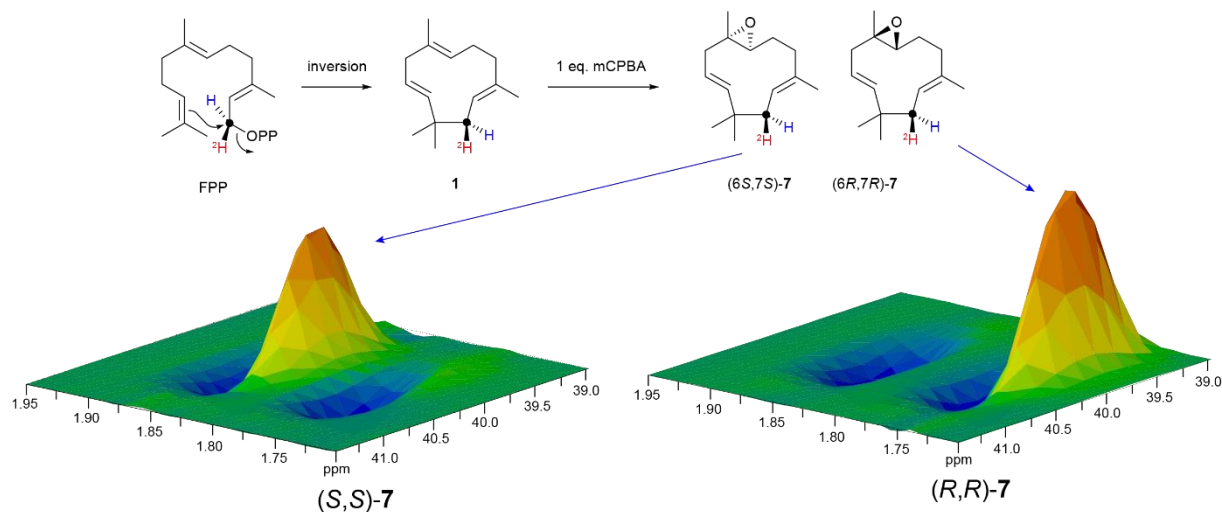

**Figure S25.** Inversion of configuration at C1. Partial HSQC spectra of A) unlabelled **7** showing crosspeaks for the two diastereotopic hydrogens at C1 (signals down for  $\text{CH}_2$  groups), B) (*S,S*)-**7** and (*R,R*)-**7** from (*R*)-(1- $^{13}\text{C}$ ,1- $^2\text{H}$ )FPP mixed with unlabelled **7**, and C) (*S,S*)-**7** and (*R,R*)-**7** from (*S*)-(1- $^{13}\text{C}$ ,1- $^2\text{H}$ )FPP mixed with unlabelled **7**. In B) and C) the signals pointing down are from unlabelled **7** ( $\text{CH}_2$  groups) and the signals pointing up are from labelled **7** ( $\text{CH}^2\text{H}$  groups), showing a slight upfield shift in both dimensions resulting from a deuterium isotope effect.

A) unlabelled

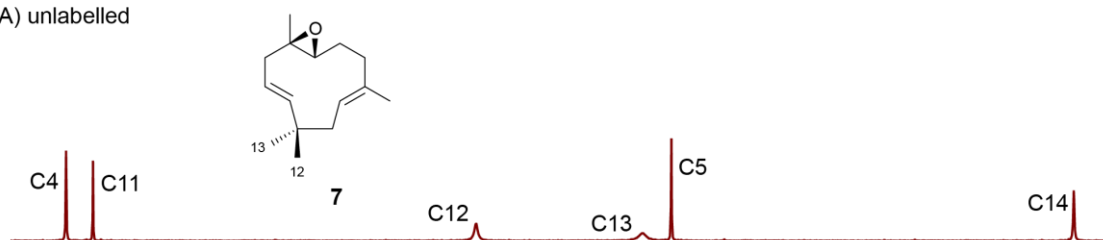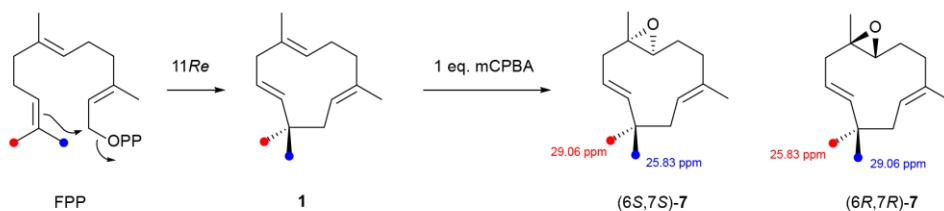

B) (S,S)-7 from (12-<sup>13</sup>C)FPP

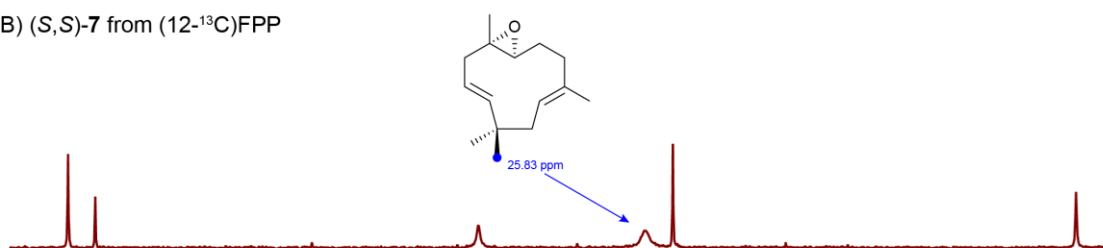

C) (R,R)-7 from (12-<sup>13</sup>C)FPP

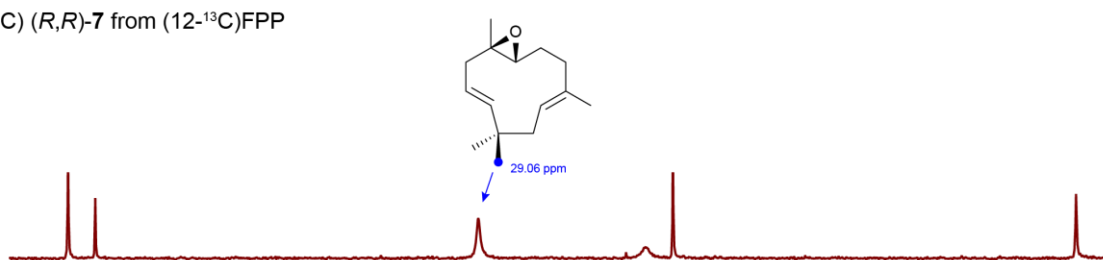

D) (S,S)-7 from (13-<sup>13</sup>C)FPP

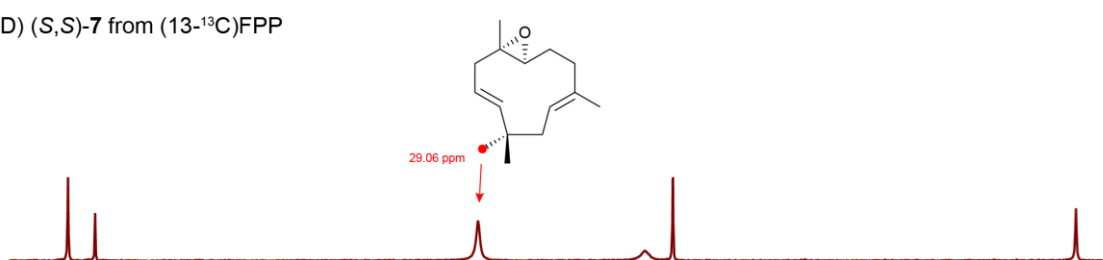

E) (R,R)-7 from (13-<sup>13</sup>C)FPP

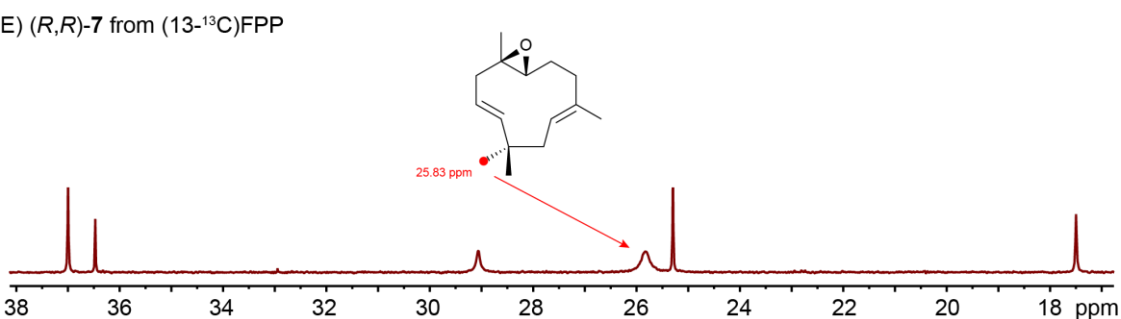

**Figure S26.** *Re* face attack at C11. Partial <sup>13</sup>C-NMR spectra of A) unlabelled **7**, B) (S,S)-**7** from (12-<sup>13</sup>C)FPP mixed with unlabelled **7** (incorporation into  $\delta = 25.83$  ppm), C) (R,R)-**7** from (12-<sup>13</sup>C)FPP mixed with unlabelled **7** (incorporation into  $\delta = 29.06$  ppm), D) (S,S)-**7** from (13-<sup>13</sup>C)FPP mixed with unlabelled **7** (incorporation into  $\delta = 29.06$  ppm), and E) (R,R)-**7** from (13-<sup>13</sup>C)FPP mixed with unlabelled **7** (incorporation into  $\delta = 25.83$  ppm).

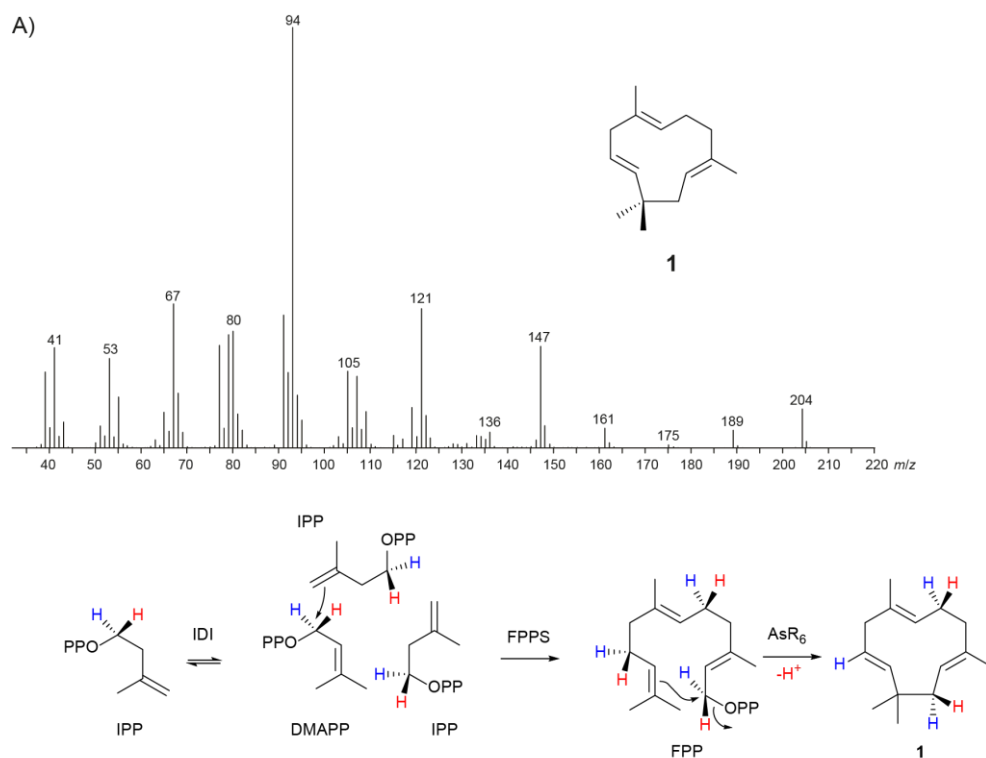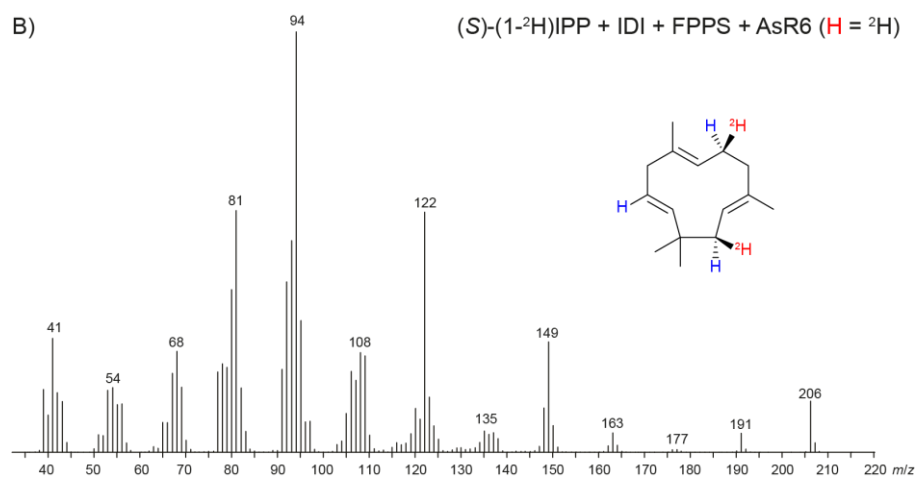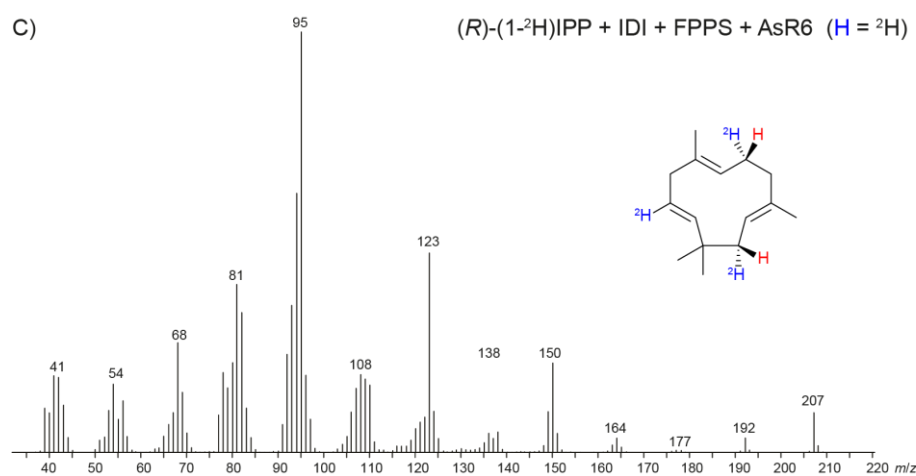

**Figure S27.** Deprotonation from C9. EI mass spectra of A) unlabelled **1**, B) ( $^2H_2$ )-**1** obtained with IDI, FPPS and AsR6 from  $(S)$ -(1- $^2H$ )IPP, and C) ( $^2H_3$ )-**1** obtained with IDI, FPPS and AsR6 from  $(R)$ -(1- $^2H$ )IPP.

## References

- 1 N. P. Damodaran and S. Dev, *Tetrahedron*, 1968, **24**, 4123.
- 2 G. R. Fulmer, A. J. M. Miller, N. H. Sherden, H. E. Gottlieb, A. Nudelman, B. M. Stoltz, J. E. Bercaw and K. I. Goldberg, *Organometallics*, 2010, **29**, 2176.
- 3 C. Schotte, P. Lukat, A. Deuschmann, W. Blankenfeldt and R. J. Cox, *Angew. Chem. Int. Ed.*, 2021, **60**, online (doi: 10.1002/ange.202106718).
- 4 P. Rabe, J. Rinkel, E. Dolja, T. Schmitz, B. Nubbemeyer, T. H. Luu and J. S. Dickschat, *Angew. Chem. Int. Ed.*, 2017, **56**, 2776.
- 5 S. Schor, C. Schotte, D. Wibberg, J. Kalinowski and R. J. Cox, *Nat. Commun.*, 2018, **9**, 1963.
- 6 P. Rabe, L. Barra, J. Rinkel, R. Riclea, C. A. Citron, T. A. Klapschinski, A. Janusko and J. S. Dickschat, *Angew. Chem. Int. Ed.*, 2015, **54**, 13448.
- 7 J. Rinkel, L. Lauterbach and J. S. Dickschat, *Angew. Chem. Int. Ed.*, 2019, **58**, 452.
- 8 J. Rinkel and J. S. Dickschat, *Org. Lett.*, 2019, **21**, 2426.
- 9 P. Rabe, J. Rinkel, B. Nubbemeyer, T. G. Köllner, F. Chen and J. S. Dickschat, *Angew. Chem. Int. Ed.*, 2016, **55**, 15420.
